# Supplementary material for: Modeling Seismic Hazard and Landslide Potentials in Northwestern Yunnan, China: Exploring Complex Fault Systems with multi-segment rupturing in a Block Rotational Tectonic Zone
Source: Copernicus journal article supplement (doi:10.5194/nhess-2024-96), 2024-07-09
Supplement: Supplementary file 2 [file nhess-2024-96-supplement.pdf]

Table S1. Rupture Parameters of the fault segments in the northwestern Yunnan region

| Fault Name              | Segment No. | Historical events |      | Characteristic EQ. |                 | Paleo-earthquakes                                                            | Holocene slip rate (mm/yr) |          | Dip       |           | References                                               |
|-------------------------|-------------|-------------------|------|--------------------|-----------------|------------------------------------------------------------------------------|----------------------------|----------|-----------|-----------|----------------------------------------------------------|
|                         |             | Time              | Mag. | Length (km)        | Mag.* ( $M_w$ ) |                                                                              | Horizontal                 | vertical | Direction | Angle (°) |                                                          |
| Lijiang-Xiaojinhe fault | F1          |                   |      | 56                 | 6.9             |                                                                              | 2.0±0.7                    | 0.2±0.1  | N         | 80        | Rui Ding, 2024, Private Communication                    |
|                         | F2          | 1976              | M6.3 | 37                 | 6.6             |                                                                              | 1.0±0.7                    | 0.2±0.1  | N         | 80        |                                                          |
|                         | F3          |                   |      | 44                 | 6.7             |                                                                              | 1.0±0.7                    | 0.2±0.1  | N         | 80        |                                                          |
|                         | F4          |                   |      | 17                 | 6.1             |                                                                              | 2.1±1.5                    | 0.4±0.2  | N         | 80        |                                                          |
|                         | F5          |                   |      | 15                 | 6.0             |                                                                              | 3.3±0.5                    | 0.4±0.2  | N         | 75        |                                                          |
|                         | F6          |                   |      | 23                 | 6.3             | <u>7940~6540 a. BP</u><br><u>4740~4050 a. BP</u><br><u>1830~420 a. BP</u>    | 3.3±1.2                    | 0.4±0.2  | N         | 75        | Gao et al., 2019<br>Ding et al., 2018                    |
|                         | F7          |                   |      | 21                 | 6.2             | <u>5120~3200 a. BP</u><br><u>2100~1200 a. BP</u>                             | 3.3±1.2                    | 0.4±0.2  | N         | 75        |                                                          |
|                         | F8          |                   |      | 25                 | 6.4             | <u>44980~17660 a. BP</u><br><u>7210~3810 a. BP</u><br><u>2540~1540 a. BP</u> | 2.4±0.5                    |          | N         | 75        | Gao et al., 2019<br>Ding et al., 2018                    |
|                         | F9          |                   |      | 16                 | 6.0             |                                                                              | 2.4±0.5                    |          | N         | 75        |                                                          |
|                         | F10         | 1951              | M6.4 | 42                 | 6.7             | <u>5980±560 a. BP</u><br><u>1770±1000 a. BP</u>                              | 2.4±0.5                    |          | N         | 75        | Li et al., 2016<br>Gao et al., 2019<br>Ding et al., 2018 |



|                     |     |                       |                              |    |     |                                                                                                                  |         |         |   |    |                                                                                                                            |
|---------------------|-----|-----------------------|------------------------------|----|-----|------------------------------------------------------------------------------------------------------------------|---------|---------|---|----|----------------------------------------------------------------------------------------------------------------------------|
|                     | F22 | 1961                  | <i>M</i> 6.1                 | 39 | 6.6 | $\frac{1075 \pm 95 \text{ a BP}}{490 \pm 110 \text{ a BP}}$                                                      |         |         | E | 80 |                                                                                                                            |
| Heqing-Eryuan fault | F23 |                       |                              | 49 | 6.8 |                                                                                                                  |         |         | W | 80 | Institute of Geology-State Seismological Bureau, and Yunnan Seismological Bureau, 1990; Han et al., 2005; Sun et al., 2017 |
|                     | F24 | 1839-2-7<br>1839-2-23 | <i>M</i> 6.3<br><i>M</i> 6.3 | 60 | 7.0 |                                                                                                                  | 2.0±1.0 | 0.7~1.0 | W | 80 |                                                                                                                            |
| Ninglang fault      | F25 |                       |                              | 16 | 6.0 |                                                                                                                  |         |         | W | 80 | Wu et al., 2023; Panxing Yang, 2024, Private Communication                                                                 |
|                     | F26 |                       |                              | 49 | 6.8 |                                                                                                                  | 0.5±0.4 | 0.0±0.3 | W | 80 |                                                                                                                            |
| Chenghai fault      | F27 | 1515                  | <i>M</i> 7.8                 | 62 | 7.0 | $\frac{9851 \text{ a BP}}{7400 \text{ a BP}} \frac{5501 \text{ a BP}}{2299 \text{ a BP}} \frac{1515 \text{ AD}}$ |         |         | W | 80 | Institute of Geology-State Seismological Bureau, and Yunnan Seismological Bureau, 1990; Yu et al., 2005                    |
|                     | F28 | 1515                  | <i>M</i> 7.8                 | 31 | 6.5 | 1606 <i>M</i> 6                                                                                                  | 3.0±1.5 | 1.7±0.3 | W | 80 |                                                                                                                            |

|                            |     |              |              |    |     |                                                                            |          |         |   |    |                                                                                                                                                         |
|----------------------------|-----|--------------|--------------|----|-----|----------------------------------------------------------------------------|----------|---------|---|----|---------------------------------------------------------------------------------------------------------------------------------------------------------|
|                            |     |              |              |    |     |                                                                            |          |         |   |    | Bureau, 1990;<br>Tang et al.,<br>2017; Huang et<br>al.,2018                                                                                             |
|                            | F29 | 1803         | M6.3         | 82 | 7.2 |                                                                            | 2.5±1.5  | 1.7±0.3 | W | 80 | Institute of<br>Geology-State<br>Seismological<br>Bureau and<br>Yunnan<br>Seismological<br>Bureau, 1990;<br>Tang et al.,<br>2017; Huang et<br>al., 2018 |
|                            | F30 |              |              | 43 | 6.7 |                                                                            |          |         | W | 80 |                                                                                                                                                         |
| Weixi-Qiaohou fault        | F31 |              |              | 37 | 6.6 |                                                                            | -1.25    | ~0.91   | W | 80 | Ren et al., 2007;                                                                                                                                       |
|                            | F32 |              |              | 49 | 6.8 |                                                                            |          |         | W | 80 |                                                                                                                                                         |
|                            | F33 |              |              | 49 | 6.8 |                                                                            |          |         | W | 80 |                                                                                                                                                         |
| Tongdian-Weishan<br>fault  | F34 |              |              | 58 | 6.9 | 28000 a. BP                                                                | -2.1±0.3 | 0.4±0.1 | W | 80 | Chang et al.,<br>2016;2022                                                                                                                              |
|                            | F35 |              |              | 54 | 6.9 |                                                                            |          |         | W | 80 |                                                                                                                                                         |
| Diancangshan East<br>fault | F36 | 1925<br>1515 | M6.9<br>M6.1 | 50 | 6.8 | 62 a BP<br>474 a BP<br>≥2070 a. BP<br>2700 a BP<br>5500 a. BP<br>6500 a.BP | /        | 1.5±0.5 | E | 80 | Guo et al.,<br>1984; Zhou et<br>al., 2004                                                                                                               |

| $\leq 10800$ a BP |     |      |              |    |     |                |   |   |    |                                      |
|-------------------|-----|------|--------------|----|-----|----------------|---|---|----|--------------------------------------|
| Red River fault   | F37 | 1623 | <i>M</i> 6.3 | 23 | 6.3 | $-1.1 \pm 0.4$ | / | W | 80 | Shi et al., 2018                     |
|                   | F38 | 1625 | <i>M</i> 6.8 | 32 | 6.5 | $-1.1 \pm 0.4$ | / | W | 80 | Shi et al., 2018;<br>Li et al., 2016 |

2

3

4

5 **References**

- 6 Chang, Z., Zhang, Y., Li, J., & Zang, Y. 2014. The Geological and Geomorphic  
7 Characteristic of Late Quaternary Activity of the Deqin-Zhongdian-Daju Fault.  
8 Journal of Seismological Research (in Chinese), **37**, 46-52.
- 9 Chang, Z., Chang, H., Zang, Y., & Dai, B. 2016. Recent active features of Weixi-  
10 Qiaohou fault and its relationship with the Honghe fault. Journal of Geomechanics  
11 (in Chinese), **22**, 517-530.
- 12 Chang, Z., Li, J., Chang, H., Luo, L., Liu, C., & He, S. 2022. Late-Quaternary Activity  
13 of Tongdian-Madeng Basin Segment of Weixi-Qiaohou fault. Acta Scientiarum  
14 Naturalium Universitatis Pekinensis (in Chinese), **58**, 875-887.
- 15 Cheng, L., Li, G., Wu, H., Yu, J., & Su, G. 2020. A Preliminary Study of Paleo-  
16 earthquake in the Majiacun-Daju Section of Zhongdian-Daju Fault, Yunnan  
17 Province. Earthquake Research in China (in Chinese), **36**, 211-220.
- 18 Ding, R., Ren, J., Zhang, S., Lu, Y., & Liu, H. 2018. Late Quaternary Paleoearthquakes  
19 on the Middle segment of the Lijiang-Xiaojinhe fault, Southeastern Tibet.  
20 Seismology and Geology (in Chinese), **40**, 622-640.
- 21 Gao, Y., Ding, R., Zhang, S., & Ren, J. 2019. Slip rate of Lijiang-Xiaojinhe fault in the  
22 Holocene. Technology for Earthquake Disaster Prevention (in Chinese), **14**, 617-  
23 627.
- 24 Guo, S., Zhang, J., Li, X., Xiang, H., Chen, T., & Zhang, G. 1984. Fault displacement  
25 and recurrence intervals of earthquakes at the northern segment of the Honghe  
26 fault zone, Yunnan Province. Seismology and Geology (in Chinese), **6**, 1-12.
- 27 Han, Z., Guo, S., Xiang, H., Zhang, J., & Ran, Y. 2004. Seismotectonic Environment  
28 of occurring the February 3, 1996 Lijiang M=7.0 earthquake, Yunnan Province.  
29 Acta Seismologica Sinica (in Chinese), **26**, 410-418.

- 30 Han, Z., Xiang, H., & Guo, S. 2005. Sinistral shear and extension of the northern section  
31 of Lijiang Basin in northwest Yunnan in Quaternary. *Chinese Science Bulletin*, **50**,  
32 452-459.
- 33 Huang, X., Wu, Z., Huang, X., & Luo, R. 2018. Tectonic Geomorphology constrains  
34 on Quaternary Activity and Segmentation along Chenghai-Binchuan Fault zone in  
35 Northwest Yunnan, China. *Earth Science (in Chinese)*, **43**, 4651-4670.
- 36 Institute of Geology-State Seismological Bureau, & Yunnan Seismological Bureau.  
37 1990. Active faults in Northwestern Yunnan Region (in Chinese). Seismological  
38 Press, Beijing, China.
- 39 Li, A., Zhang, S., Ding, R., & Wang, X. 2016. A Paleoseismic research of the south  
40 segment of the Lijiang-Xiaojinhe fault in the Holocene. *Crustal Structure and*  
41 *Crustal Stress*, 1-9.
- 42 Li, X., Ran, Y., Chen, L., Wang, H., Yu, J., Zhang, Y., & Xie, Y. 2016. The Holocene  
43 seismic evidence on southern segment of the Red River fault zone. *Seismology*  
44 *and Geology (in Chinese)*, **38**, 598-604.
- 45 Ren, J., Zhang, S., Hou, Z., & Liu, X. 2007. Study of Late Quaternary slip rate in the  
46 Mid-Segment of the Tongdian-Weishan fault. *Seismology and Geology (in*  
47 *Chinese)*, **29**, 756-764.
- 48 Shi, X., Sieh, K., Weldon, R., Zhu, C., Han, Y., Yang, J., & Robinson, S. 2018. Slip rate  
49 and rare large prehistoric earthquakes of the Red River fault, southwestern China.  
50 *Geochemistry, Geophysics, Geosystems*, **19**, doi:10.1029/2017GC007420.
- 51 Sun, C., Li, D., Shen, X., Kang, Y., Liu, R., & Zhang, Y. 2017. Holocene activity  
52 evidence on the southeast boundary fault of Heqing basin, middle segment of  
53 Heqing-Eryuan fault zone, West Yunnan Province. China. *Journal of Mountain*  
54 *Science*, **14**, 1445-1453.

- 55 Tang, Y., Hu, C., Tian, Q., Wang, L., Yang, P., & Xiong, R. 2014. A Preliminary Study  
56 of Paleo-earthquakes in the Jianchuan Section of Longpan-Qiaohou Fault Zone,  
57 Yunnan Province. *Earthquake (in Chinese)*, **34**, 117-124.
- 58 Tang, F., Ma, H., & Song, J. 2017. Study on the Late Quaternary activity of Chenghai  
59 fault zone. *Proceeding of the 16<sup>th</sup> World conference on earthquake engineering*,  
60 Santiago, Chile.
- 61 Wu, X., Xu, X., Yu, G., Ren, J., Yang, X., Chen, G., Xu, C., Du, K., Huang, X., Yang,  
62 H., Li, K., & Hao, H. 2023. China Active Faults Database and its web system.  
63 *Earth System Science Data*, doi:10.5194/essd-2023-119.
- 64 Yu, W., Zhang, J., Zhou, G., Wang, J., & Zeng, X. 2005. Surface Rupture of the 2001  
65 Yongsheng *M*<sub>6</sub> Earthquake and Chenghai Fault. *Journal of Seismological*  
66 *Research (in Chinese)*, **28**, 125-128.
- 67 Zhou, Q., Guo, S., & Xiang, H. 2004. Principle and method of delineation of potential  
68 seismic sources in northeastern Yunnan Province. *Seismology and Geology (in*  
69 *Chinese)*, **26**, 761-771.
