# Supplementary figures and images for: Modeling Seismic Hazard and Landslide Potentials in Northwestern Yunnan, China: Exploring Complex Fault Systems with multi-segment rupturing in a Block Rotational Tectonic Zone
Source: Copernicus journal article supplement (doi:10.5194/nhess-2024-96), 2024-07-09

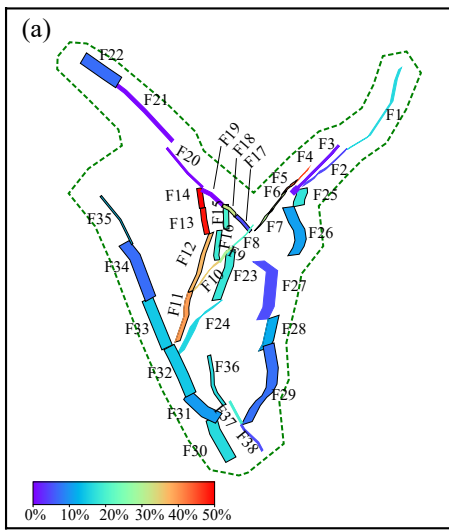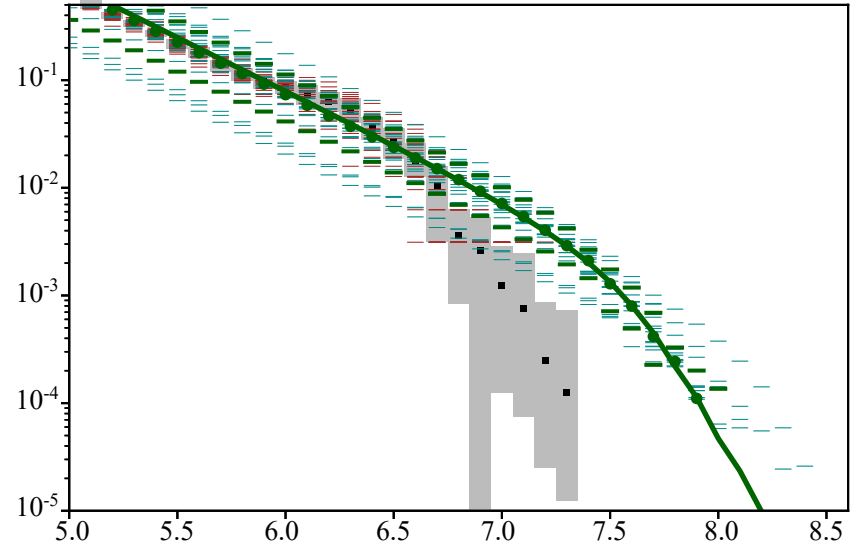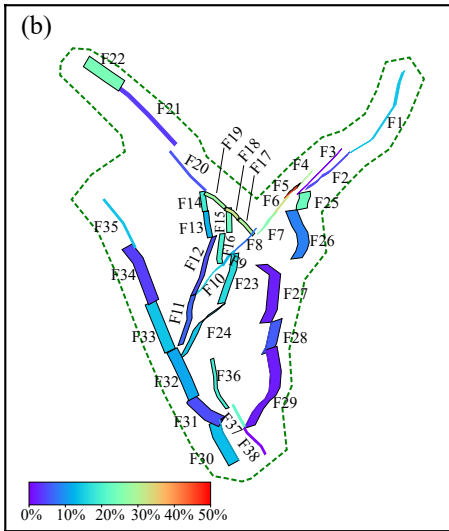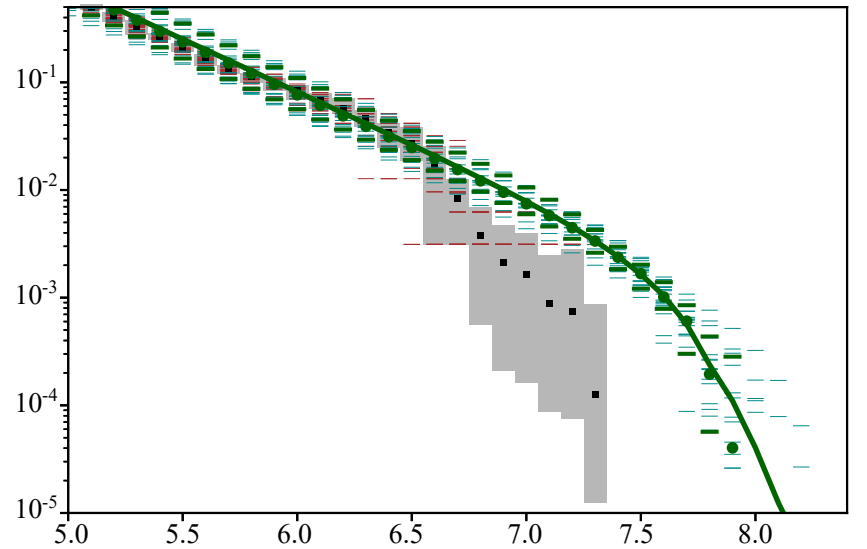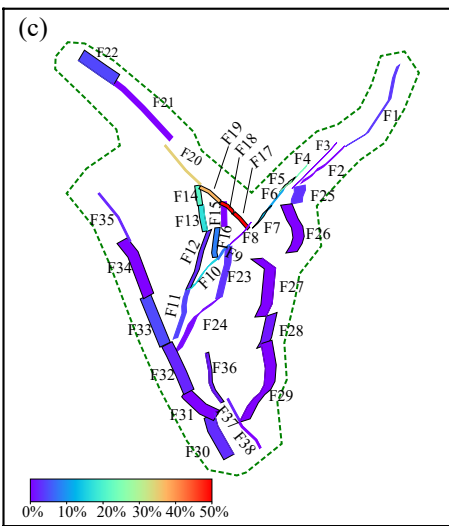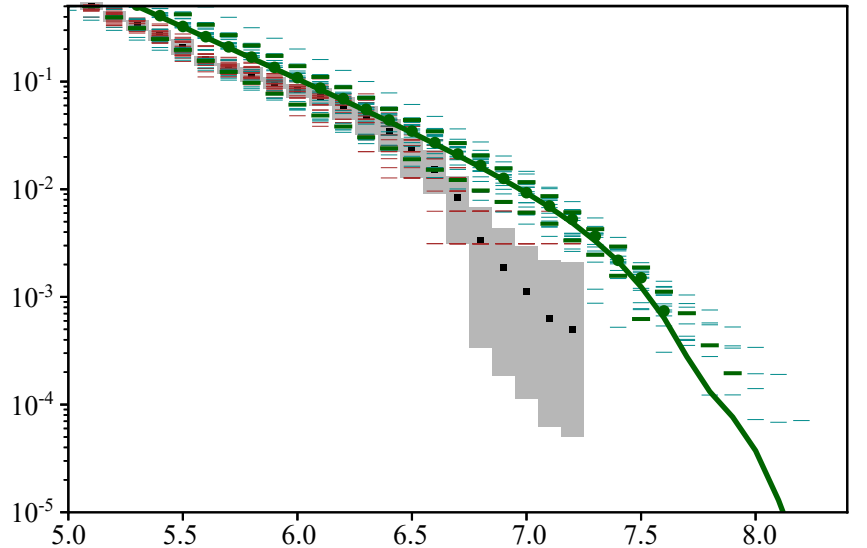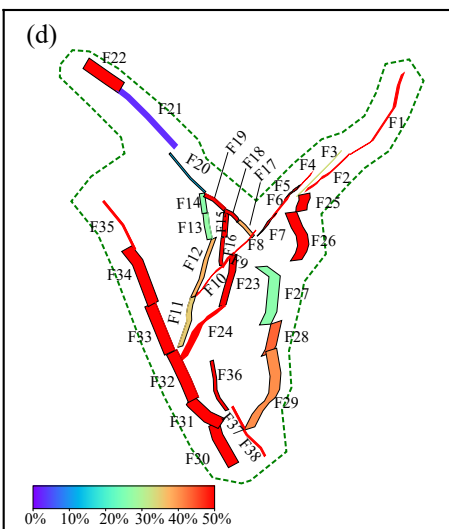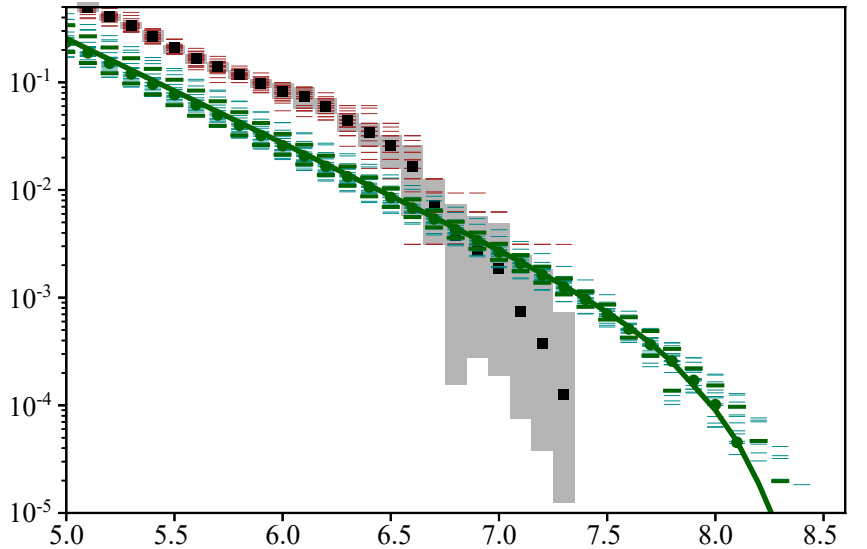

Supplement: Supplementary file 1 [file nhess-2024-96-supplement-version3.pdf]
